# Supplementary material for: Stage-specific survival has improved for young breast cancer patients since 2000: but not equally
Source: Springer Nature journal article supplement (doi:10.1007/s10549-020-05698-z), 2020-06-03
Supplement: MOESM2 [file 18046108]

## Online Resource 2

Non-parametric Pohar Perme estimates of stage-specific 5-year relative survival, by education level, income quintile and combined education/income group. Breast cancer patients aged 30-48 years at diagnosis during 2000-2004 or 2005-2015, with a known stage at diagnosis (N = 7007).

| Stage     | Education level               | Estimated five-year relative survival <sup>a</sup> |            |                            |           | Change in relative survival 2000-2004 to 2005-2015 % |
|-----------|-------------------------------|----------------------------------------------------|------------|----------------------------|-----------|------------------------------------------------------|
|           |                               | Diagnosed during 2000-2004                         |            | Diagnosed during 2005-2015 |           |                                                      |
|           |                               | %                                                  | (95% CI)   | %                          | (95% CI)  |                                                      |
| Localized | Compulsory                    | 97                                                 | (91, 99)   | 98                         | (95, 99)  | 1                                                    |
|           | Secondary                     | 97                                                 | (94, 99)   | 98                         | (96, 99)  | 1                                                    |
|           | Tertiary                      | 99                                                 | (94, 100)  | 98                         | (97, 99)  | -1                                                   |
|           | Tertiary – Compulsory         | 2                                                  |            | 0                          |           |                                                      |
|           |                               |                                                    |            |                            |           |                                                      |
| Regional  | Compulsory                    | 83                                                 | (78, 87)   | 88                         | (85, 87)  | 5                                                    |
|           | Secondary                     | 87                                                 | (84, 90)   | 91                         | (84, 90)  | 4                                                    |
|           | Tertiary                      | 86                                                 | (83, 89)   | 92                         | (83, 89)  | 6                                                    |
|           | Tertiary – Compulsory         | 3                                                  |            | 4                          |           |                                                      |
|           |                               |                                                    |            |                            |           |                                                      |
| Distant   | Compulsory                    | 15                                                 | (5, 30)    | 12                         | (3, 27)   | -3                                                   |
|           | Secondary                     | 17                                                 | (7, 30)    | 51                         | (36, 64)  | 34                                                   |
|           | Tertiary                      | 17                                                 | (6, 34)    | 46                         | (32, 59)  | 29                                                   |
|           | Tertiary – Compulsory         | 2                                                  |            | 34                         |           |                                                      |
|           |                               |                                                    |            |                            |           |                                                      |
| Stage     | Income quintile               |                                                    |            |                            |           |                                                      |
| Localized | Q1 (low)                      | 99                                                 | (90, 100)  | 97                         | (94, 99)  | -2                                                   |
|           | Q2-Q4                         | 98                                                 | (95, 99)   | 98                         | (97, 99)  | 0                                                    |
|           | Q5 (high)                     | 96                                                 | (91, 99)   | 98                         | (95, 99)  | 2                                                    |
|           | Q5 (high) – Q1 (low)          | -3                                                 |            | 1                          |           |                                                      |
|           |                               |                                                    |            |                            |           |                                                      |
| Regional  | Q1 (low)                      | 87                                                 | (82, 91)   | 87                         | (84, 90)  | 0                                                    |
|           | Q2-Q4                         | 85                                                 | (82, 87)   | 91                         | (89, 92)  | 4                                                    |
|           | Q5 (high)                     | 88                                                 | (83, 91)   | 95                         | (92, 96)  | 7                                                    |
|           | Q5 (high) – Q1 (low)          | 1                                                  |            | 8                          |           |                                                      |
|           |                               |                                                    |            |                            |           |                                                      |
| Distant   | Q1 (low)                      | 18                                                 | (7, 34)    | 29                         | (15, 44)  | 11                                                   |
|           | Q2-Q4                         | 11                                                 | (4, 22)    | 41                         | (29, 51)  | 30                                                   |
|           | Q5 (high)                     | 29                                                 | (9, 52)    | 64                         | (39, 81)  | 35                                                   |
|           | Q5 (high) – Q1 (low)          | 11                                                 |            | 35                         |           |                                                      |
|           |                               |                                                    |            |                            |           |                                                      |
| Stage     | Education/Income <sup>b</sup> |                                                    |            |                            |           |                                                      |
| Localized | Low/Low                       | 101                                                | (101, 101) | 98                         | (88, 101) | -3                                                   |
|           | Low/High                      | 96                                                 | (89, 98)   | 98                         | (94, 98)  | 2                                                    |
|           | High/Low                      | 98                                                 | (88, 100)  | 97                         | (92, 100) | -1                                                   |
|           | High/High                     | 98                                                 | (95, 99)   | 98                         | (97, 99)  | 0                                                    |
|           | High/High – Low/Low           | -3                                                 |            | 0                          |           |                                                      |

|          |                     |     |          |    |          |     |
|----------|---------------------|-----|----------|----|----------|-----|
| Regional | Low/Low             | 86  | (77, 92) | 86 | (81, 91) | 0   |
|          | Low/High            | 82  | (76, 86) | 89 | (85, 92) | 7   |
|          | High/Low            | 87  | (81, 92) | 88 | (84, 91) | 1   |
|          | High/High           | 87  | (84, 89) | 92 | (91, 94) | 5   |
|          | High/High – Low/Low | 1   |          | 6  |          |     |
| Distant  | Low/Low             | 34  | (11, 59) | 11 | (2, 30)  | -23 |
|          | Low/High            | 0   |          | 13 | (1, 39)  | 13  |
|          | High/Low            | 6   | (1, 23)  | 41 | (20, 61) | 35  |
|          | High/High           | 21  | (11, 33) | 50 | (38, 60) | 29  |
|          | High/High – Low/Low | -13 |          | 39 |          |     |

<sup>a</sup>Pohar Perme estimates of relative survival of breast cancer patients five years after diagnosis, compared to the expected survival of the Norwegian female population of the same age and calendar year as the patients.

<sup>b</sup>Education/Income group: Low/Low: Compulsory/Income quintile Q1; Low/High: Compulsory/ Income quintiles Q2-Q5; High/Low: Secondary-Tertiary/Q1; High/High: Secondary-Tertiary/Q2-Q5.

**Journal:** Breast Cancer Research and Treatment

**Title:** Stage-specific survival has improved for young breast cancer patients since 2000: but not equally

**Authors:** Cassia Bree Trewin, Anna Louise Viktoria Johansson, Kirsti Vik Hjerkind, Bjørn Heine Strand, Cecilie Esholt Kiserud, Giske Ursin.

**Corresponding author:** Cassia Bree Trewin, Cancer Registry of Norway, [cassie.trewin@krefregisteret.no](mailto:cassie.trewin@krefregisteret.no)
